# Supplementary material for: Quantification and expert evaluation of evidence for chemopredictive biomarkers to personalize cancer treatment
Source: PubMed Central journal article supplement (PMC5514962; doi:10.18632/oncotarget.13544), 2016-11-24
Supplement: oncotarget-08-37923-s001.pdf [file oncotarget-08-37923-s001.pdf]

## **Quantification and expert evaluation of evidence for chemopredictive biomarkers to personalize cancer treatment**

### **SUPPLEMENTARY TABLES**

**Supplementary Table S1: Evidence for ERCC1 and platinum drugs.**

**See Supplementary File 1**

**Supplementary Table S2: Evidence for MGMT and temozolomide.**

**See Supplementary File 2**

**Supplementary Table S3: Evidence for RRM1 and gemcitabine.**

**See Supplementary File 3**

**Supplementary Table S4: Evidence for TYMS and 5-FU/capecitabine.**

**See Supplementatry File 4**

**Supplementary Table S5: Evidence for TUBB3 and taxanes.**

**See Supplementary File 5**

**Supplementary Table S6: Evidence for TOP1 and irinotecan/topotecan.**

**See Supplementary File 6**

**Supplementary Table S7: Evidence for TOP2A and anthracyclines.**

**See Supplementary File 7**
